# Supplementary material for: Genes, Culture and Conservatism-A Psychometric-Genetic Approach
Source: PubMed Central journal article supplement (PMC4886154; doi:10.1007/s10519-015-9768-9), 2015-11-20
Supplement: 10519_2015_9768_MOESM1_ESM.pdf [file 10519_2015_9768_MOESM1_ESM.pdf]

# Genes, Culture and Conservatism - A Psychometric-Genetic Approach: Supplementary Material

Inga Schwabe      Wilfried Jonker  
Stéphanie M. van den Berg

This document contains supplementary material for the article “Genes, Culture and Conservatism - A Psychometric-Genetic Approach”.

## **JAGS script**

The JAGS (Plummer, 2003) script that was used for the biometric analysis described in the paper can be found at the end of this document. As similar syntax is used, the script can be used also in the free software package WinBUGS (Lunn, Thomas, Best, & Spiegelhalter, 2000) with minor adaptations. As an interface from R to JAGS, the rjags package was used (Plummer, 2013). The same script without the IRT part was used for the sum score analysis.

## **Homogeneity analysis: category point plots for all items**

In order to interpret what the two dimensions represent, we plotted category points plots for the “yes”, “no” and “?” answers. The category points plots for items with a high loading on the first dimension can be found in Figure 1 and Figure 2 and Figure 3 shows the category points plots for items with a high loading on the second dimension. Proportion of “yes”, “?” and “no” answers were added to all category points plots.

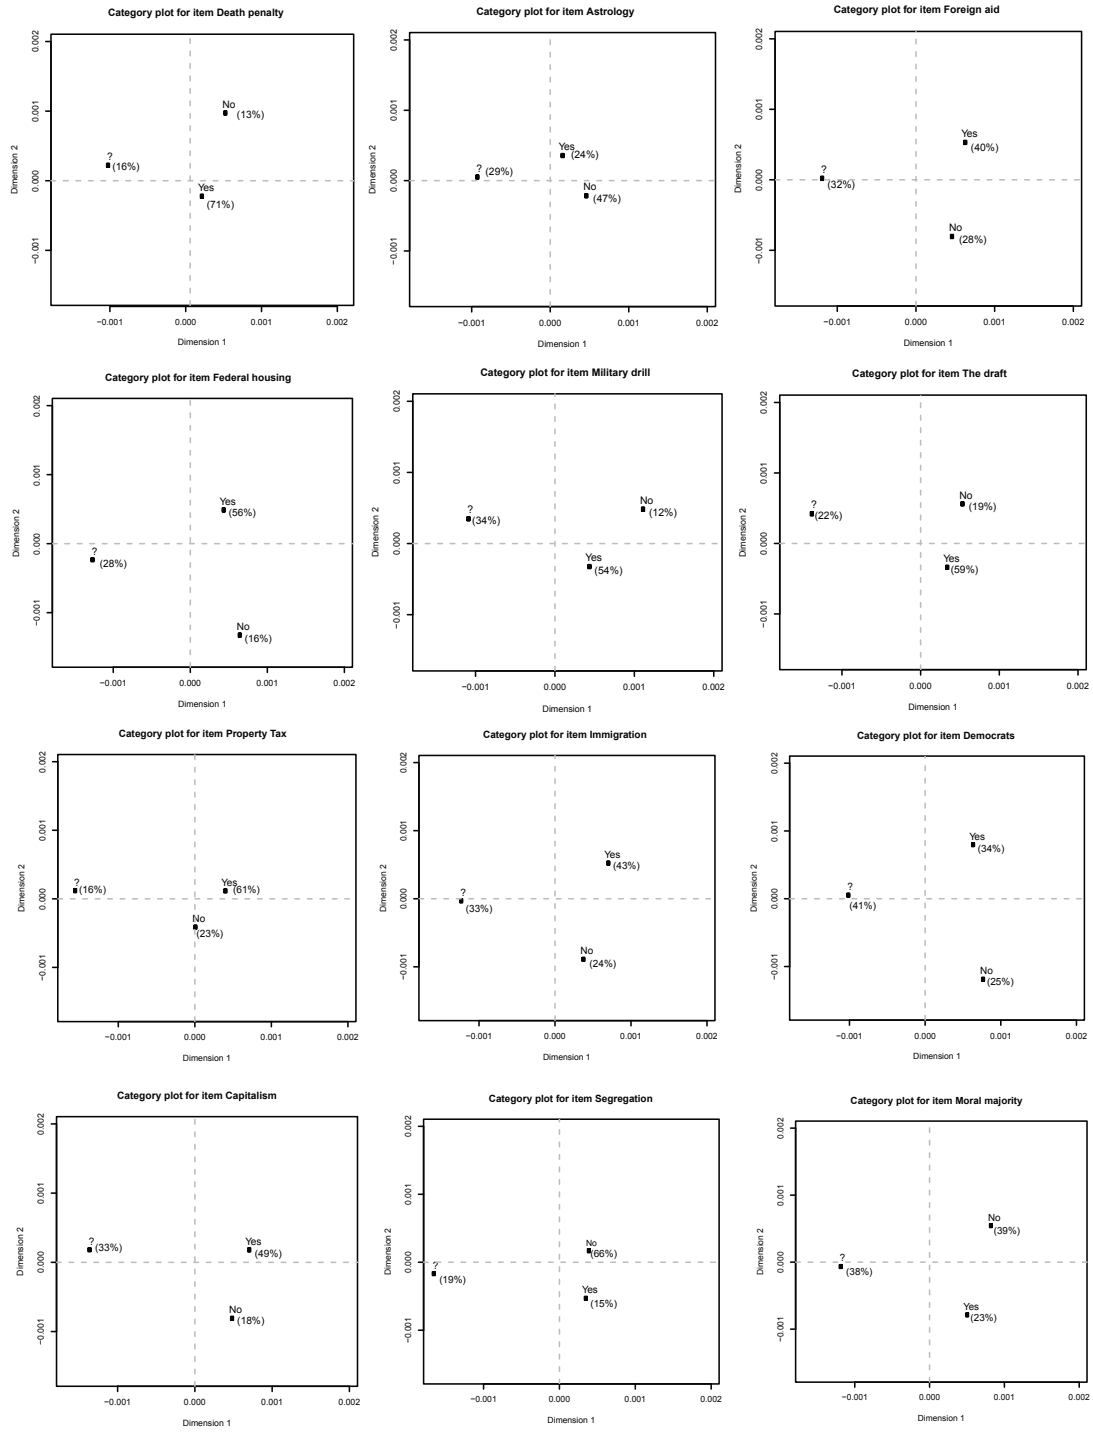

Figure 1: Category plots for items with high loadings on dimension 1 (part I).

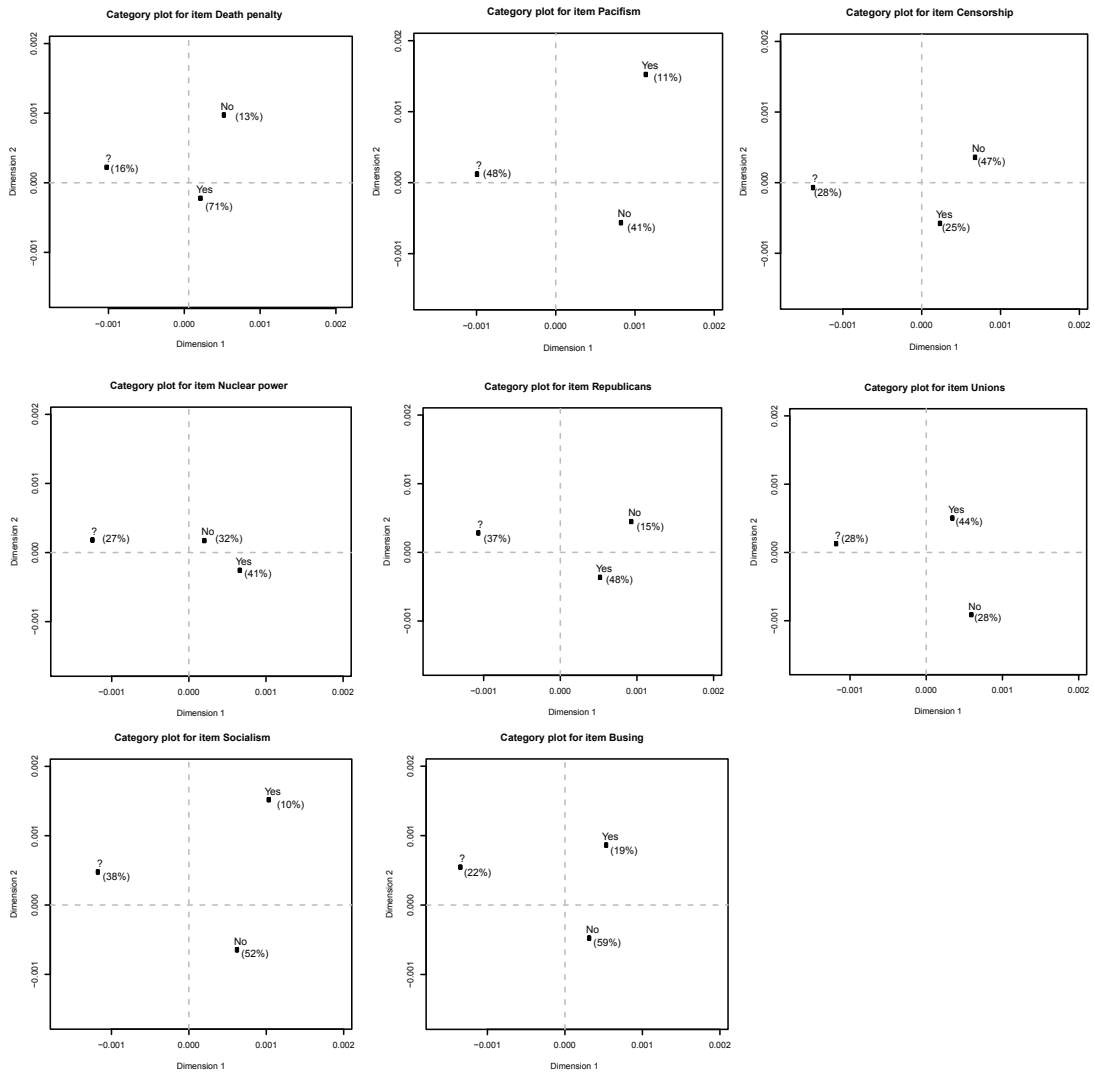

Figure 2: Category plots for items with high loadings on dimension 1 (part II)

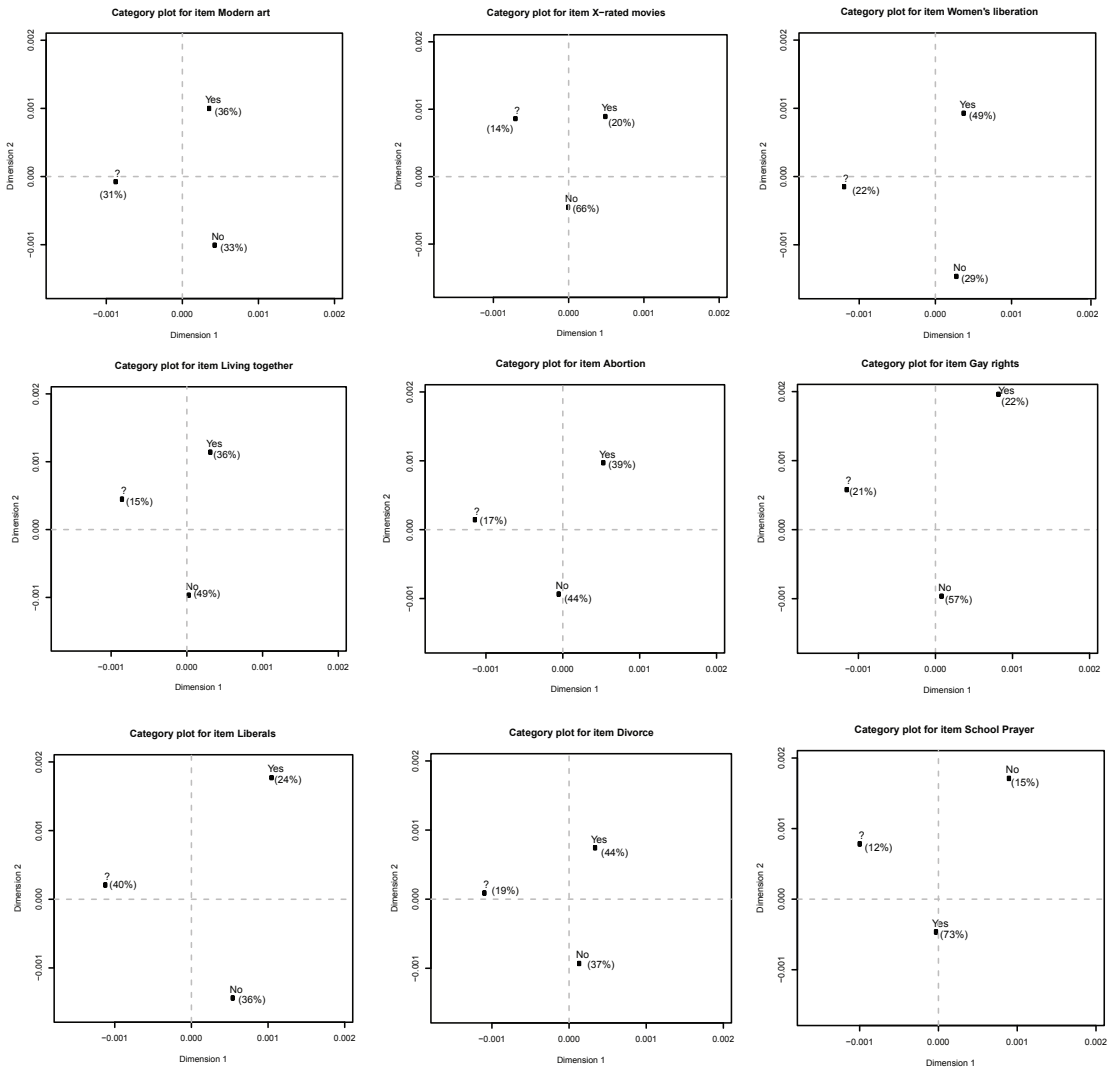

Figure 3: Category plots for items with high loadings on dimension 2.

## Observed and expected number of responses

Observed number of responses for each response category as well as expected number of responses for each response category under the Generalized Partial Credit Model (GPCM) were plotted for ordered bins of total scores.

As stated in the manuscript, item fit statistics showed the largest chi-square value for the “Liberalism” item. Figure 4 however shows that there is no systematic misfit for this item: the red lines (observed number of responses) largely overlap with the corresponding black lines (number of responses predicted by the fitted GPCM), as they do for all items. Figure 5 shows model fit based on twin data only.

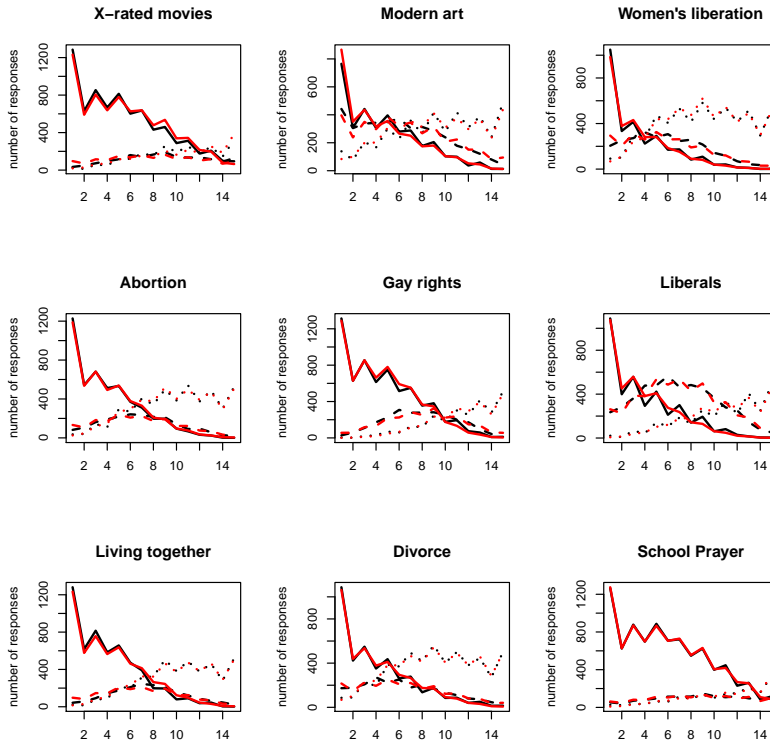

Figure 4: Observed (black) and expected (red) number of responses for each response category (“yes” = dotted line, “no” = solid line, “?” = dashed line), for ordered bins of total score (x-axis). Parent and twin data.

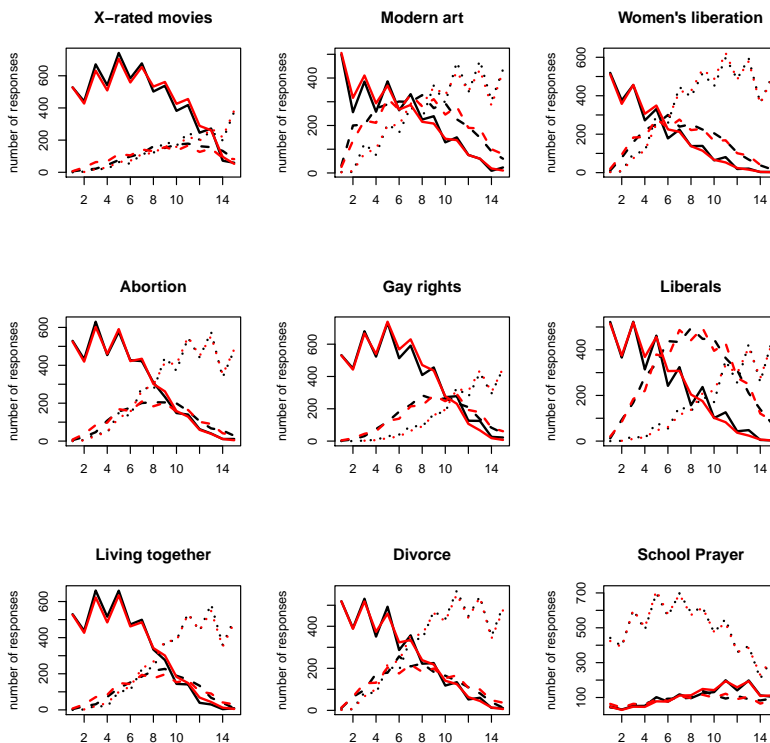

Figure 5: Observed (black) and expected (red) number of responses for each response category (“yes” = dotted line, “no” = solid line, “?” = dashed line), for ordered bins of total score (x-axis). Twin data only.

## References

- Lunn, D. J., Thomas, A., Best, N., & Spiegelhalter, D. (2000). A bayesian modeling framework: Concepts, structure, and extensibility. *Statistical Computing*, 10, 325–337.
- Plummer, M. (2003). *Jags: A program for analysis of bayesian graphical models using gibbs sampling*.
- Plummer, M. (2013). *rjags: Bayesian graphical models using mcmc* [Computer software manual]. Retrieved from <http://CRAN.R-project.org/package=rjags> (R package version 3-10)

## JAGS script

```
1 #Following script incorporates an ACE model with a generalized
2 #partial credit (GPCM) IRT model
3 #while modelling AxE and AxC genotype-environment interaction effects.
4
5 #y_dz = Item responses of DZ twins (matrix)
6 #y_mz = Item responses of MZ twins (matrix)
7 #n_mz = Number of MZ twin pairs,
8 #n_dz = Number of DZ twin pairs,
9 #n_items = Number of items administered
10
11 #Required structure of the y_dz/y_mz data matrix:
12 #y_dz[i,k] = kth datapoint from the ith DZ twin pair
13 #y_mz[i,k] = kth datapoint from the ith MZ twin pair
14
15 #This results in a matrix of n_mz (or, in case of y_dz, n_dz)
16 #rows and 2*n_items columns
17
18 #e.g. y_mz[1,22] is the response of MZ twin 1 from family 1 to item 22
19 #and y_mz[1,23] is the response of MZ twin 2 from family 1 to item 1
20 #if n_items = 22
21
22 #JAGS uses precision parameters for the variance parameters.
23 #Therefore, after running the script, these precision parameters
24 #should be inverted. For example:
25 #var_a <- 1/outputAnalysis$tau_a[,1] with the rjags package
26
27 model{
28 #MZ twins
29 for (i in 1:n_mz){
30     c_mz[i] ~ dnorm(0, tau_c_mz[i])
31     a_mz[i] ~ dnorm(0, tau_a)
32
33     tau_c_mz[i] <- 1/(exp(gamma0 + gamma1*a_mz[i]))
34     tau_e_mz[i] <- 1/(exp(beta0 + beta1*a_mz[i]))
35
36     #Phenotypic values:
37     mz[i,1] ~ dnorm(a_mz[i] + c_mz[i], tau_e_mz[i])
38     mz[i,2] ~ dnorm(a_mz[i] + c_mz[i], tau_e_mz[i])
39
40     for (j in 1:n_items){
41         for (k in 1:3){
42             eta[i,j,k] <- alpha[j] * (mz[i,1] - beta[j,k])
43             psum[i,j,k] <- sum(eta[i,j,1:k])
44             exp_psum[i,j,k] <- exp(psum [i,j,k])
```

```

45         prob [i ,j ,k] <- exp_psum[i ,j ,k]/sum(exp_psum [i ,j ,1:3])
46     }
47 }
48
49     for (j in (n_items+1):(2*n_items)){
50         for (k in 1:3){
51             eta [i ,j ,k] <- alpha [j-n_items] * (mz[i ,2] - beta [j-n_items ,k])
52             psum [i ,j ,k] <- sum(eta [i ,j ,1: k])
53             exp_psum [i ,j ,k] <- exp( psum [i , j , k])
54             prob [i ,j ,k] <- exp_psum[i ,j ,k]/sum(exp_psum [i ,j ,1:3])
55         }
56     }
57
58     for (j in 1:(2*n_items)){
59         y_mz[i ,j] ~ dcat (prob [i ,j ,1:3]) # multinomial dist. data
60     }
61 } #end MZ twins
62
63 #DZ twins
64 for (i in 1:n_dz){
65     c_dz [i] ~ dnorm(0, 1)
66
67     a1_dz [i] ~ dnorm(0, doubletau_a)
68     a2_dz [i ,1] ~ dnorm(a1_dz [i], doubletau_a)
69     a2_dz [i ,2] ~ dnorm(a1_dz [i], doubletau_a)
70
71     tau_c_dz [i ,1] <- exp(gamma0 + gamma1*a2_dz [i ,1])
72     tau_c_dz [i ,2] <- exp(gamma0 + gamma1*a2_dz [i ,2])
73
74     c_dz_twin1 [i] <- c_dz [i] * sqrt(tau_c_dz [i ,1])
75     c_dz_twin2 [i] <- c_dz [i] * sqrt(tau_c_dz [i ,2])
76
77     tau_e_dz [i ,1] <- 1/(exp(beta0 + beta1*a2_dz [i ,1]))
78     tau_e_dz [i ,2] <- 1/(exp(beta0 + beta1*a2_dz [i ,2]))
79
80     dz [i ,1] ~ dnorm(a2_dz [i ,1] + c_dz_twin1 [i], tau_e_dz [i ,1])
81     dz [i ,2] ~ dnorm(a2_dz [i ,2] + c_dz_twin2 [i], tau_e_dz [i ,2])
82
83     for (j in 1:n_items){
84         for (k in 1:3){
85             etadz [i ,j ,k] <- alpha [j] * (dz [i ,1] - beta [j ,k])
86             psumdz [i ,j ,k] <- sum(etadz [i ,j ,1: k])
87             exp_psumdz [i ,j ,k] <- exp(psumdz [i ,j ,k])
88             probdz [i ,j ,k] <- exp_psumdz [i ,j ,k]/sum(exp_psumdz [i ,j ,1:3])
89         }
90     }

```



```

91     }
92
93     for (j in (n_items+1):(2*n_items)){
94         for (k in 1:3){
95             etadz[i,j,k] <- alpha[j-n_items] * (dz[i,2] - beta[j-n_items,k])
96             psumdz[i,j,k] <- sum(etadz[i,j,1:k])
97             exp_psumdz[i,j,k] <- exp(psumdz[i,j,k])
98             probdz[i,j,k] <- exp_psumdz[i,j,k]/sum(exp_psumdz[i,j,1:3])
99         }
100     }
101
102     for (j in 1:(2*n_items)){
103         y_dz[i,j] ~ dcat(probdz[i,j,1:3]) # multinomial dist. data
104     }
105 } #end DZ twins
106
107 #DZ twins genetic correlation 0.5:
108 doubletau_a <- 2*tau_a
109
110 #Set alpha of item 3 to 1 to identify the scale,
111 alpha[3] <- 1
112
113 #for the rest of the alpha parameters:
114 #lognormal prior with expectation of 0 (log(0) = 1) and variance of 10
115 alpha[1] ~ dlnorm(0, .1)
116 alpha[2] ~ dlnorm(0, .1)
117
118 for (j in 4:n_items){
119     alpha[j] ~ dlnorm(0, .1)
120 }
121
122 #Beta IRT parameters: Use normal distribution with expectation of 0 and
123 #variance of 10:
124 for (j in 1:n_items){
125     beta[j, 1] <- 0.0
126
127     for (k in 2:3){
128         beta[j, k] ~ dnorm(0, .1)
129     }
130 }
131
132 #Priors for variance components, intercepts and interaction effects:
133 tau_a ~ dgamma(1,1)
134 beta0 ~ dnorm(-1,.5)
135 beta1 ~ dnorm(0,.1)
136 gamma0 ~ dnorm(-1,.5)

```

```
137 gamma1 ~ dnorm(0 ,.1)
138 }
```
